# Supplementary figures and images for: Illness and (hyper)masculinity in ‘HIMM’ comics from the USA
Source: HighWire-hosted journal article supplement (doi:10.1136/medhum-2023-012767), 2023-12-26

Supplementary Figure 1

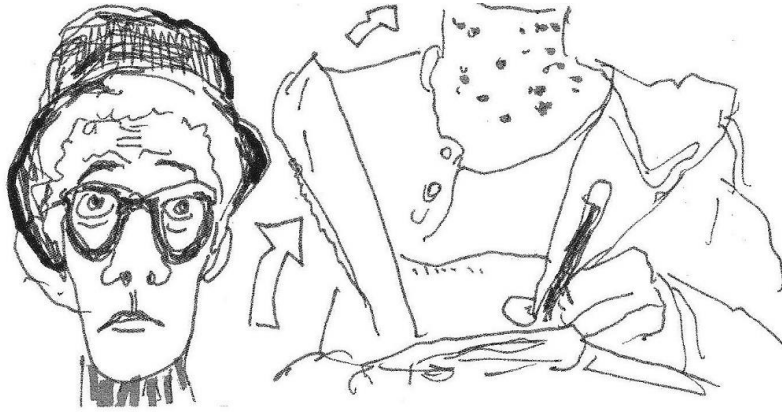

Supplement: medhum-2023-012767supp001_data_supplement.pdf [file medhum-2023-012767supp001_data_supplement.pdf]
